# Supplementary material
Source: HighWire-hosted journal article supplement (https://www.ajnr.org/highwire/filestream/58262/field_highwire_adjunct_files/0/17-00118.pdf)
Supplement: 17-00118.pdf [file 17-00118.pdf]

**On-line Table: Scanning parameters for each patient**

| Patient No. | Sequence | 2D vs 3D | FOV  |      |         | Slice          |        | TR (ms) | Flip Angle | No. of Volumes | TE (ms) | TI (ms) | Manufacturer | Model | Field Strength |
|-------------|----------|----------|------|------|---------|----------------|--------|---------|------------|----------------|---------|---------|--------------|-------|----------------|
|             |          |          | (mm) | Rows | Columns | Thickness (mm) | (mm)   |         |            |                |         |         |              |       |                |
| 1           | BOLD     | 2D       | 210  | 64   | 64      | 5              | 2000   | 90°     | 180        | 30             | 0       | GE      | Signa HDxt   | 3T    |                |
| 2           | BOLD     | 2D       | 224  | 64   | 64      | 4              | 2000   | 84°     | 0          | 34             | 0       | GE      | Signa Excite | 1.5T  |                |
| 3           | BOLD     | 2D       | 240  | 80   | 80      | 6              | 1000   | 72°     | 200        | 20             | 0       | Philips | Achieva      | 3T    |                |
| 4           | BOLD     | 2D       | 210  | 64   | 64      | 5              | 2000   | 90°     | 180        | 30             | 0       | Philips | Achieva      | 3T    |                |
| 5           | BOLD     | 2D       | 230  | 128  | 128     | 4              | 3000   | 90°     | 80         | 35             | 0       | GE      | Signa HDxt   | 3T    |                |
| 6           | BOLD     | 2D       | 230  | 64   | 64      | 5              | 2000   | 90°     | 180        | 30             | 0       | GE      | Signa HDxt   | 3T    |                |
| 7           | BOLD     | 2D       | 224  | 64   | 64      | 4              | 2000   | 84°     | 0          | 34             | 0       | GE      | Signa Excite | 1.5T  |                |
| 8           | BOLD     | 2D       | 212  | 128  | 128     | 4              | 3000   | 90°     | 80         | 35             | 0       | GE      | Signa HDxt   | 3T    |                |
| 9           | BOLD     | 2D       | 240  | 64   | 64      | 3              | 3000   | 90°     | 80         | 35             | 0       | GE      | Signa HDxt   | 3T    |                |
| 10          | BOLD     | 2D       | 240  | 80   | 80      | 6              | 1000   | 72°     | 302        | 20             | 0       | Philips | Achieva      | 3T    |                |
| 11          | BOLD     | 2D       | 232  | 128  | 128     | 4              | 3000   | 90°     | 80         | 35             | 0       | GE      | Signa HDxt   | 3T    |                |
| 12          | BOLD     | 2D       | 192  | 64   | 64      | 3              | 2000   | 77°     | 165        | 28             | 0       | Philips | Intera       | 1.5T  |                |
| 13          | BOLD     | 2D       | 220  | 64   | 64      | 3              | 2400   | 75°     | 150        | 30             | 0       | GE      | Signa HDxt   | 3T    |                |
| 14          | BOLD     | 2D       | 192  | 64   | 64      | 3              | 2000   | 77°     | 165        | 28             | 0       | Philips | Intera       | 1.5T  |                |
| 15          | BOLD     | 2D       | 192  | 64   | 64      | 3              | 2000   | 77°     | 165        | 28             | 0       | Philips | Intera       | 1.5T  |                |
| 16          | BOLD     | 2D       | 192  | 64   | 64      | 3              | 2000   | 77°     | 165        | 28             | 0       | Philips | Intera       | 1.5T  |                |
| 17          | BOLD     | 2D       | 224  | 64   | 64      | 4              | 2000   | 84°     | 0          | 34             | 0       | GE      | Signa Excite | 1.5T  |                |
| 1           | FLAIR    | 2D       | 220  | 512  | 512     | 5              | 9502   | 90°     | 0          | 125            | 2250    | GE      | Signa HDxt   | 3T    |                |
| 2           | FLAIR    | 2D       | 220  | 256  | 256     | 5              | 8802   | 90°     | 0          | 123            | 2200    | GE      | Signa Excite | 1.5T  |                |
| 3           | FLAIR    | 2D       | 220  | 560  | 560     | 5              | 11,000 | 90°     | 1          | 125            | 2800    | Philips | Achieva      | 3T    |                |
| 4           | FLAIR    | 3D       | 256  | 256  | 256     | 2              | 8000   | 90°     | 1          | 337            | 2400    | Philips | Achieva      | 3T    |                |
| 5           | FLAIR    | 2D       | 220  | 512  | 512     | 5              | 9502   | 90°     | 0          | 125            | 2250    | GE      | Signa HDxt   | 3T    |                |
| 6           | FLAIR    | 2D       | 240  | 512  | 512     | 5              | 9502   | 90°     | 0          | 127            | 2250    | GE      | Signa HDxt   | 3T    |                |
| 7           | FLAIR    | 2D       | 220  | 256  | 256     | 5              | 8802   | 90°     | 0          | 122            | 2200    | GE      | Signa Excite | 1.5T  |                |
| 8           | FLAIR    | 2D       | 220  | 560  | 560     | 5              | 11,000 | 90°     | 1          | 125            | 2800    | Philips | Achieva      | 3T    |                |
| 9           | FLAIR    | 2D       | 220  | 512  | 512     | 5              | 9000   | 90°     | 0          | 135            | 2250    | GE      | Signa HDxt   | 3T    |                |
| 10          | FLAIR    | 2D       | 220  | 560  | 560     | 5              | 11,000 | 90°     | 1          | 125            | 2800    | Philips | Achieva      | 3T    |                |
| 11          | FLAIR    | 2D       | 220  | 512  | 512     | 5              | 9500   | 90°     | 0          | 125            | 2250    | GE      | Signa HDxt   | 3T    |                |
| 12          | FLAIR    | 3D       | 250  | 432  | 432     | 1              | 8000   | 90°     | 1          | 282            | 2400    | Philips | Intera       | 1.5T  |                |
| 13          | FLAIR    | 2D       | 220  | 512  | 512     | 5              | 9502   | 90°     | 0          | 124            | 2250    | GE      | Signa HDxt   | 3T    |                |
| 14          | FLAIR    | 3D       | 250  | 432  | 432     | 1              | 8000   | 90°     | 1          | 282            | 2400    | Philips | Intera       | 1.5T  |                |
| 15          | FLAIR    | 3D       | 250  | 432  | 432     | 1              | 8000   | 90°     | 1          | 282            | 2400    | Philips | Intera       | 1.5T  |                |
| 16          | FLAIR    | 3D       | 250  | 432  | 432     | 2              | 8000   | 90°     | 1          | 299            | 2400    | Philips | Intera       | 1.5T  |                |
| 17          | FLAIR    | 2D       | 240  | 256  | 256     | 5              | 8802   | 90°     | 0          | 104            | 2200    | GE      | Signa Excite | 1.5T  |                |
| 1           | TI+Gd    | 3D       | 260  | 512  | 512     | 1              | 10     | 13°     | 0          | 4              | 450     | GE      | Signa HDxt   | 3T    |                |
| 2           | TI+Gd    | 3D       | 256  | 256  | 256     | 1              | 19     | 20°     | 0          | 5              | 0       | GE      | Signa Excite | 1.5T  |                |
| 3           | TI+Gd    | 3D       | 256  | 256  | 256     | 1              | 18     | 30°     | 1          | 2              | 0       | Philips | Achieva      | 3T    |                |
| 4           | TI+Gd    | 3D       | 256  | 256  | 256     | 1              | 18     | 30°     | 1          | 2              | 0       | Philips | Achieva      | 3T    |                |
| 5           | TI+Gd    | 2D       | 220  | 512  | 512     | 5              | 2972   | 90°     | 0          | 16             | 1238    | GE      | Signa HDxt   | 3T    |                |
| 6           | TI+Gd    | 2D       | 240  | 512  | 512     | 5              | 2971   | 90°     | 0          | 16             | 1238    | GE      | Signa HDxt   | 3T    |                |
| 7           | TI+Gd    | 3D       | 256  | 256  | 256     | 1              | 19     | 20°     | 0          | 5              | 0       | GE      | Signa Excite | 1.5T  |                |
| 8           | TI+Gd    | 2D       | 220  | 512  | 512     | 5              | 3021   | 90°     | 0          | 16             | 875     | GE      | Signa HDxt   | 3T    |                |
| 9           | TI+Gd    | 2D       | 260  | 512  | 512     | 5              | 1983   | 90°     | 0          | 24             | 851     | GE      | Signa HDxt   | 3T    |                |
| 10          | TI+Gd    | 3D       | 256  | 256  | 256     | 1              | 7      | 8°      | 1          | 3              | 0       | Philips | Achieva      | 3T    |                |
| 11          | TI+Gd    | 2D       | 220  | 512  | 512     | 5              | 3088   | 90°     | 0          | 16             | 884     | GE      | Signa HDxt   | 3T    |                |
| 12          | TI+Gd    | 3D       | 256  | 256  | 256     | 1              | 25     | 30°     | 1          | 6              | 0       | Philips | Intera       | 1.5T  |                |
| 13          | TI+Gd    | 3D       | 260  | 512  | 512     | 1              | 10     | 13°     | 0          | 4              | 450     | GE      | Signa HDxt   | 3T    |                |
| 14          | TI+Gd    | 3D       | 256  | 256  | 256     | 1              | 25     | 30°     | 1          | 6              | 0       | Philips | Intera       | 1.5T  |                |
| 15          | TI+Gd    | 3D       | 256  | 256  | 256     | 1              | 25     | 30°     | 1          | 6              | 0       | Philips | Intera       | 1.5T  |                |
| 16          | TI+Gd    | 2D       | 220  | 256  | 256     | 5              | 450    | 90°     | 1          | 15             | 0       | Philips | Intera       | 1.5T  |                |
| 17          | TI+Gd    | 3D       | 256  | 256  | 256     | 1              | 19     | 20°     | 0          | 5              | 0       | GE      | Signa Excite | 1.5T  |                |
